# Supplementary material for: Design of Conjugates Based on Sesquiterpene Lactones with Polyalkoxybenzenes by “Click” Chemistry to Create Potential Anticancer Agents
Source: MDPI journal article supplement (doi:10.3390/molecules27238411), 2022-12-01
Supplement: s1 [file s1]

*Supplementary Materials*

# Design of Conjugates Based on Sesquiterpene Lactones with Polyalkoxybenzenes by “Click” Chemistry to Create Potential Anticancer Agents

Margarita E. Neganova <sup>1,2</sup>, Ekaterina V. Smirnova <sup>1</sup>, Elena V. Sharova <sup>1</sup>, Oleg I. Artyushin <sup>1</sup>, Yulia R. Aleksandrova <sup>2</sup>, Ekaterina Yu. Yandulova <sup>2</sup>, Natalia S. Nikolaeva <sup>2</sup> and Valery K. Brel <sup>1,\*</sup>

<sup>1</sup> Nesmeyanov Institute of Organoelement Compounds, Russian Academy of Sciences, 119991 Moscow, Russia

<sup>2</sup> Institute of Physiologically Active Compounds at Federal Research Center of Problems of Chemical Physics and Medicinal Chemistry, Russian Academy of Sciences, 142432 Chernogolovka, Russia

\* Correspondence: v\_brel@mail.ru; Tel.: +7-(499)1356373

## List of content:

1. NMR spectra of compound **3** S2
2. NMR spectra of compound **4** S3
3. NMR spectra of compound **5c** S4
4. NMR spectra of compounds **6a-d** S5-S8
5. NMR spectra of compounds **7a-d** S9-S12

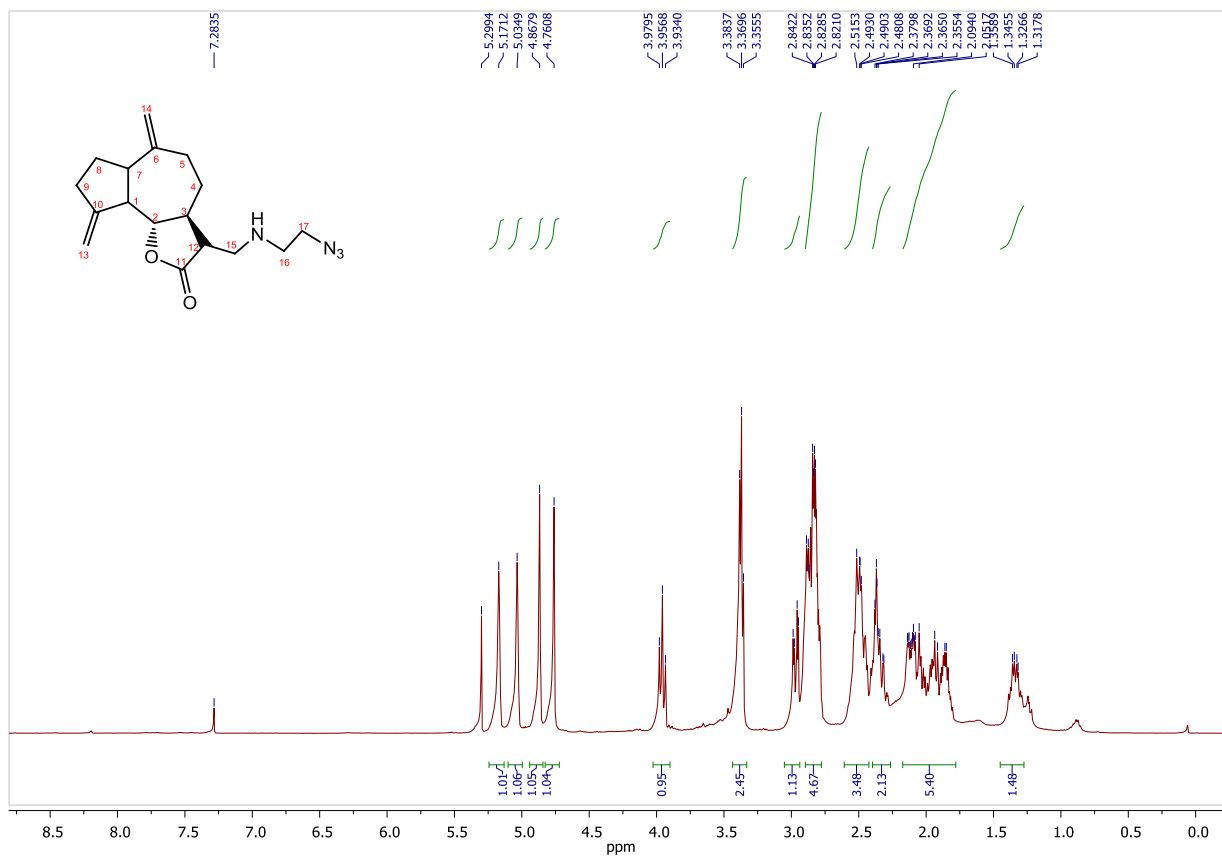

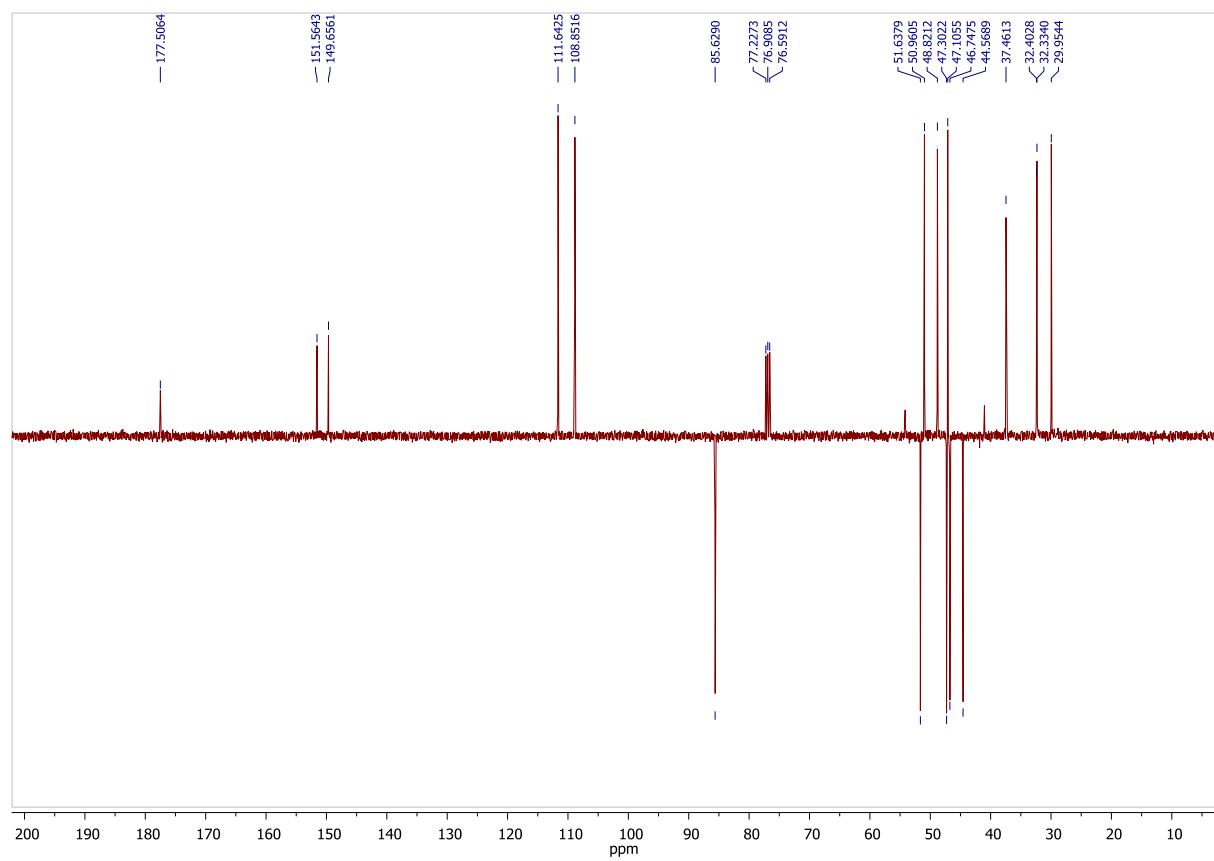

$^1\text{H}$  and  $^{13}\text{C}$  NMR spectra of compound **3** ( $\text{CDCl}_3$ )

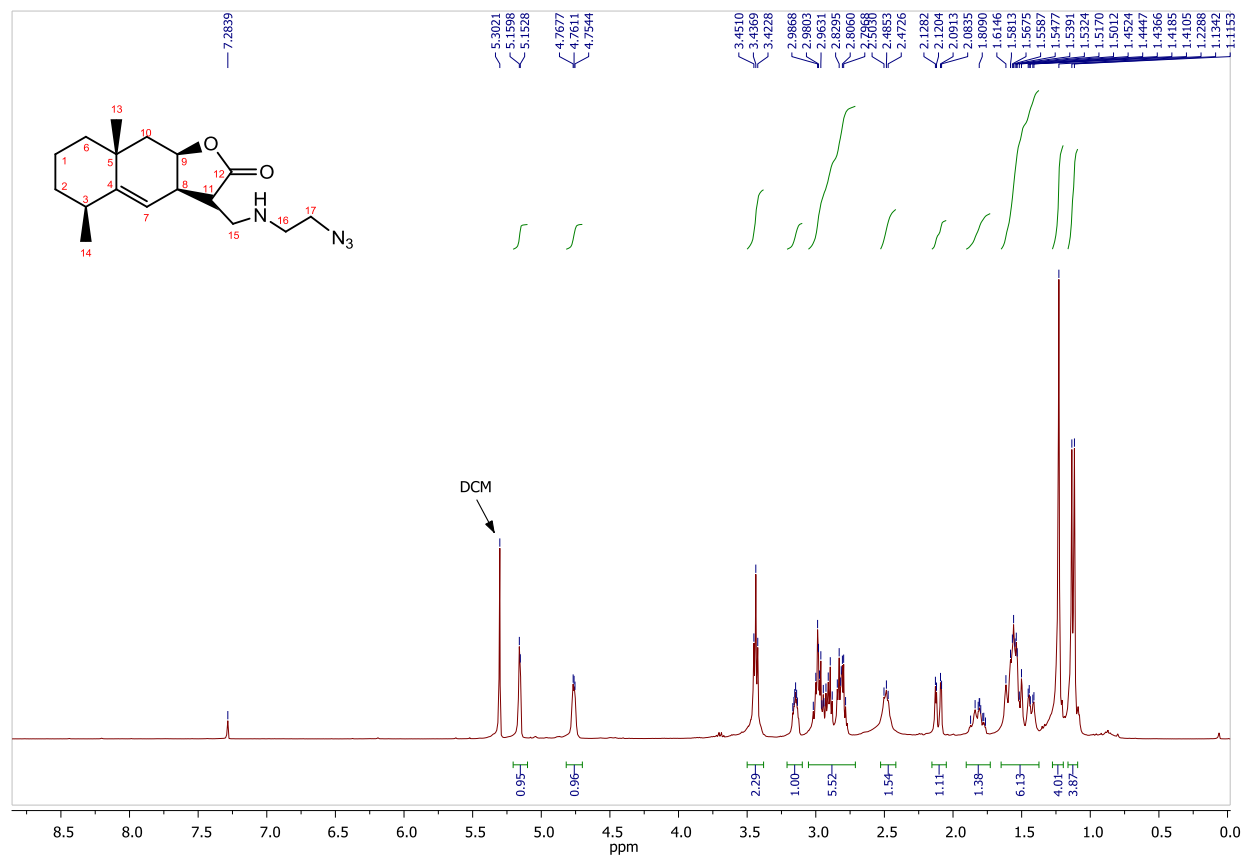

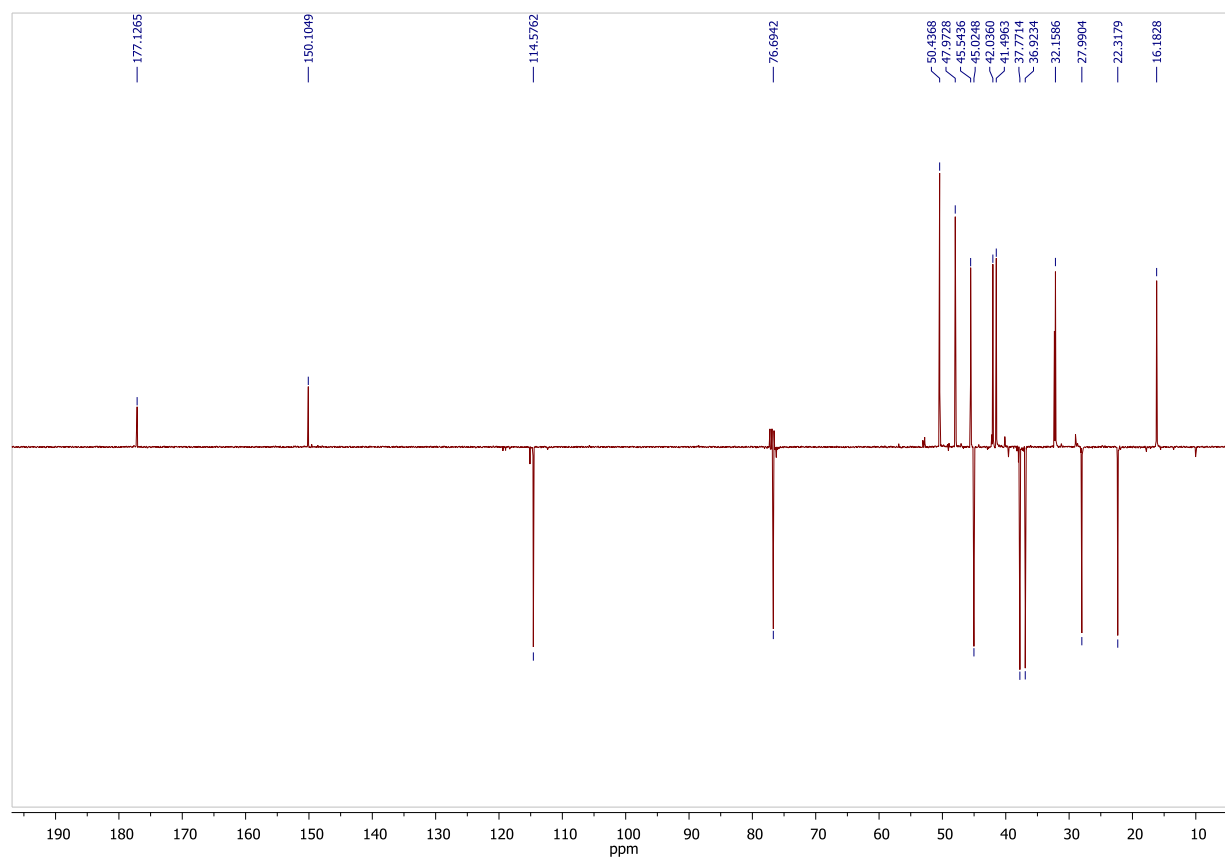

$^1\text{H}$  and  $^{13}\text{C}$  NMR spectra of compound **4** ( $\text{CDCl}_3$ )

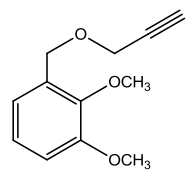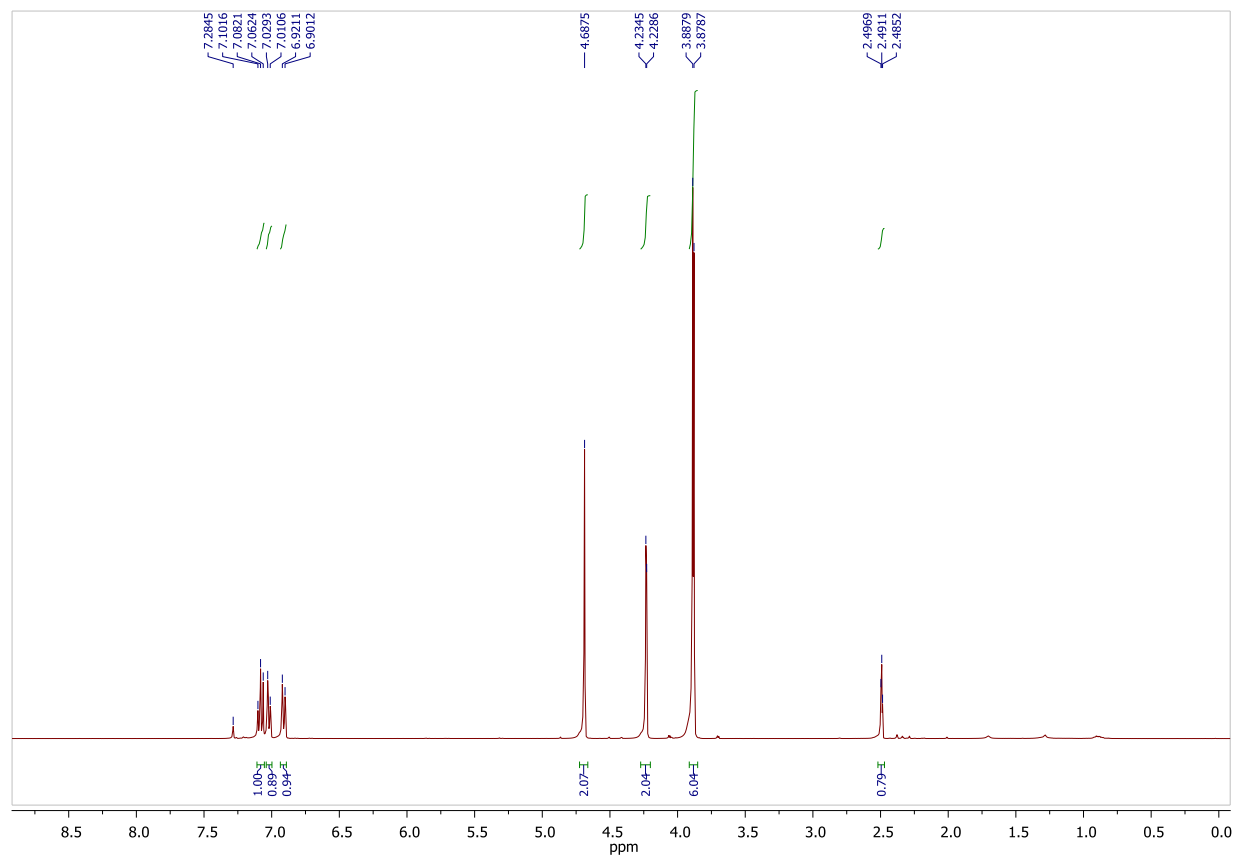

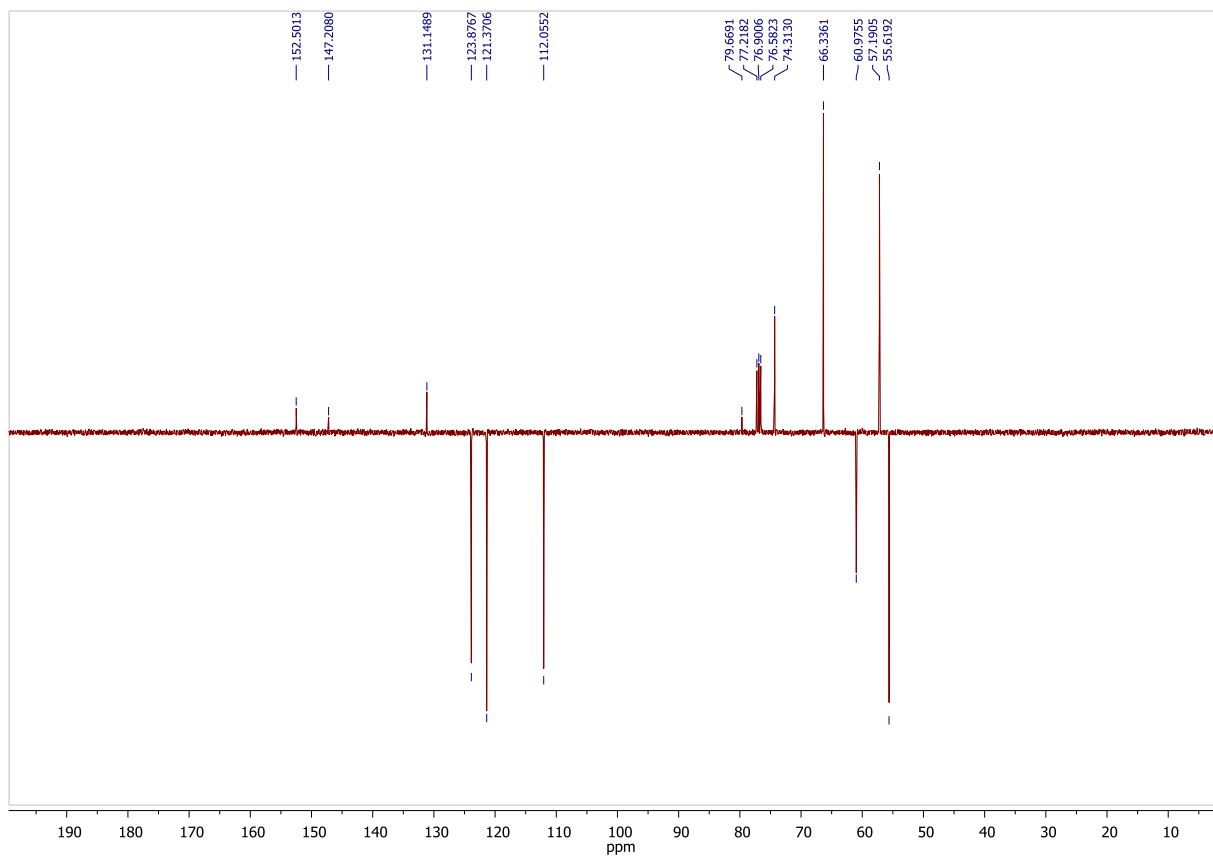

$^1\text{H}$  and  $^{13}\text{C}$  NMR spectra of compound **5c** ( $\text{CDCl}_3$ )

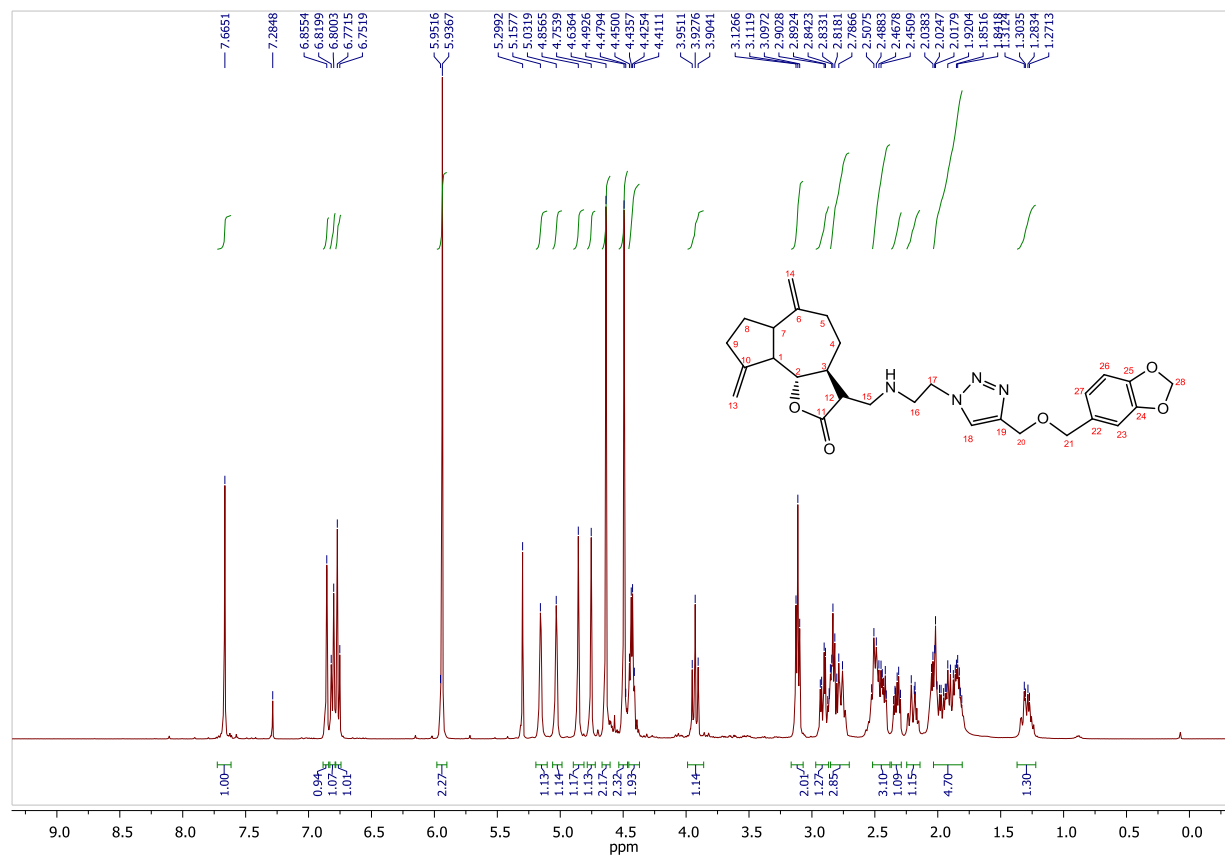



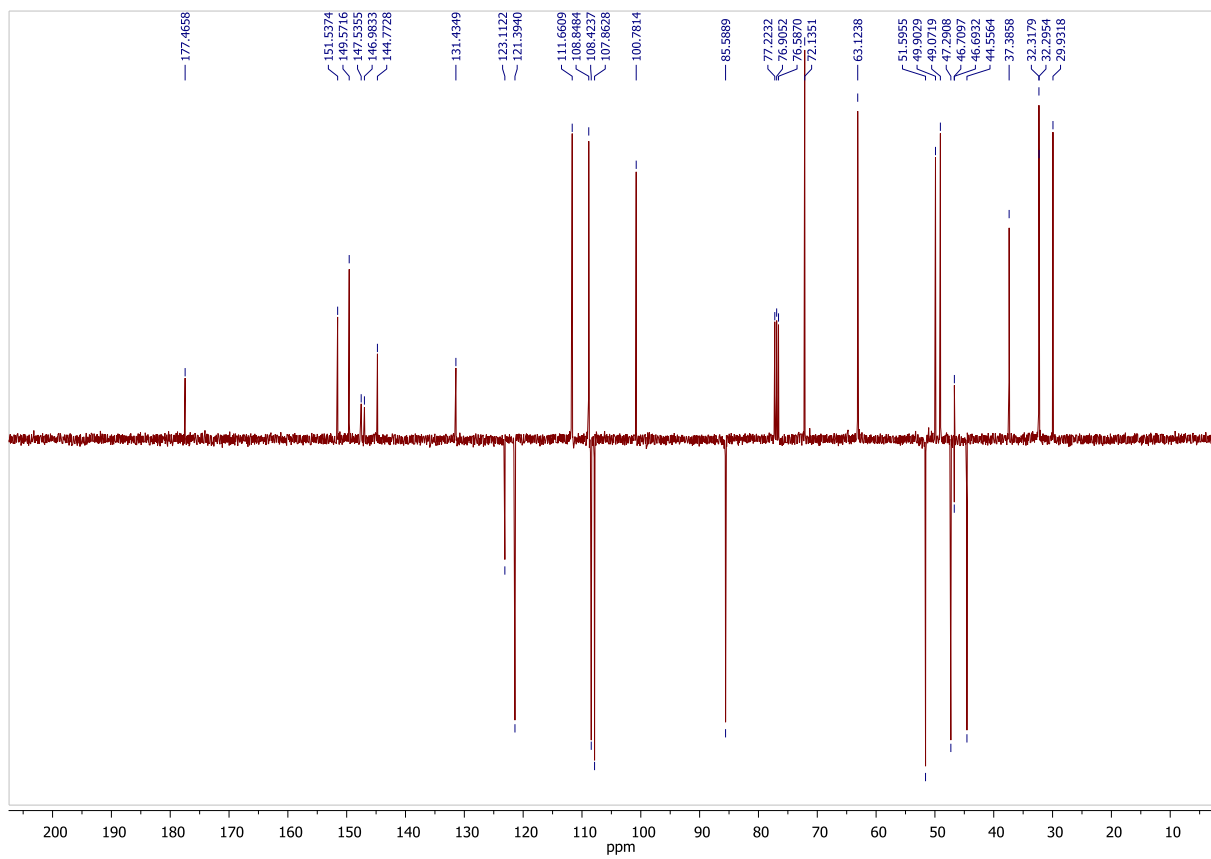

$^1\text{H}$  and  $^{13}\text{C}$  NMR spectra of compound **6a** ( $\text{CDCl}_3$ )

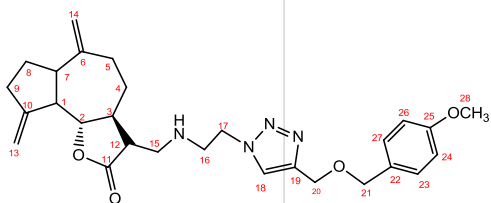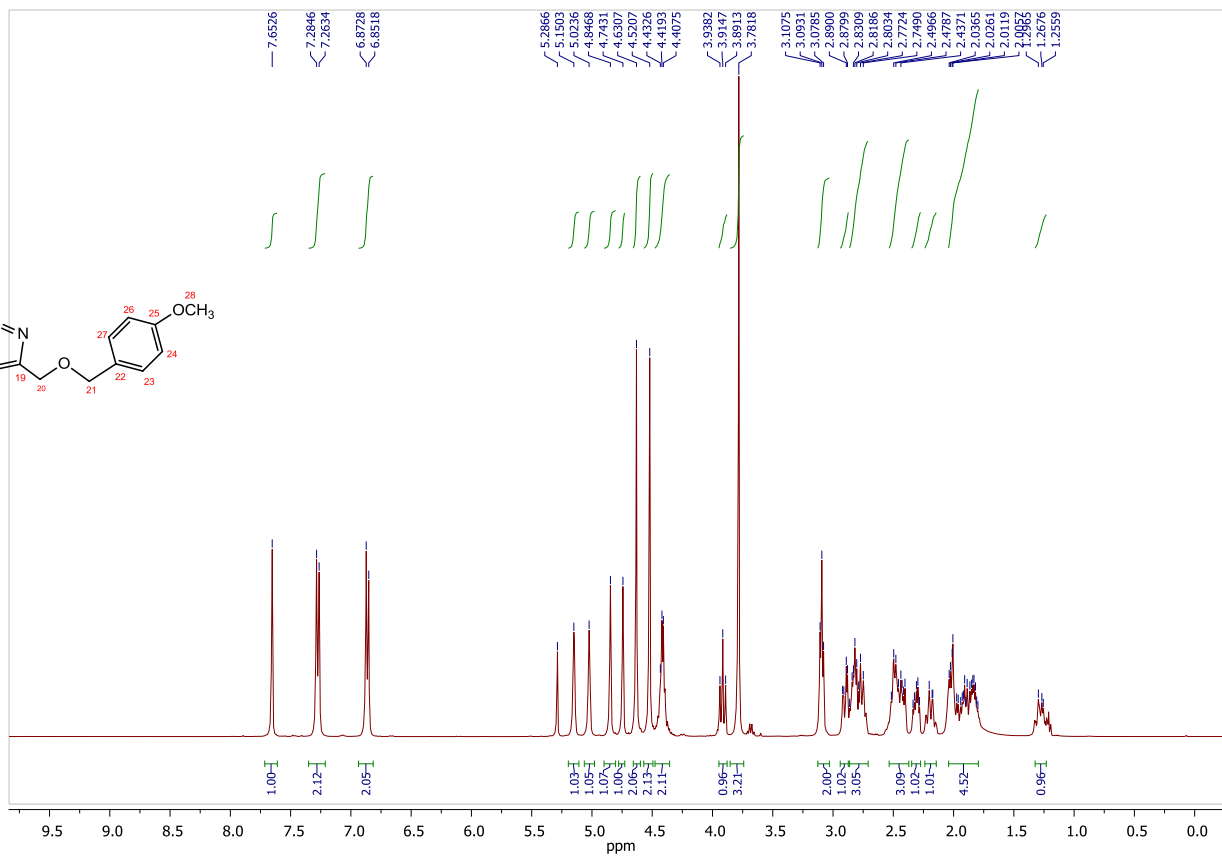

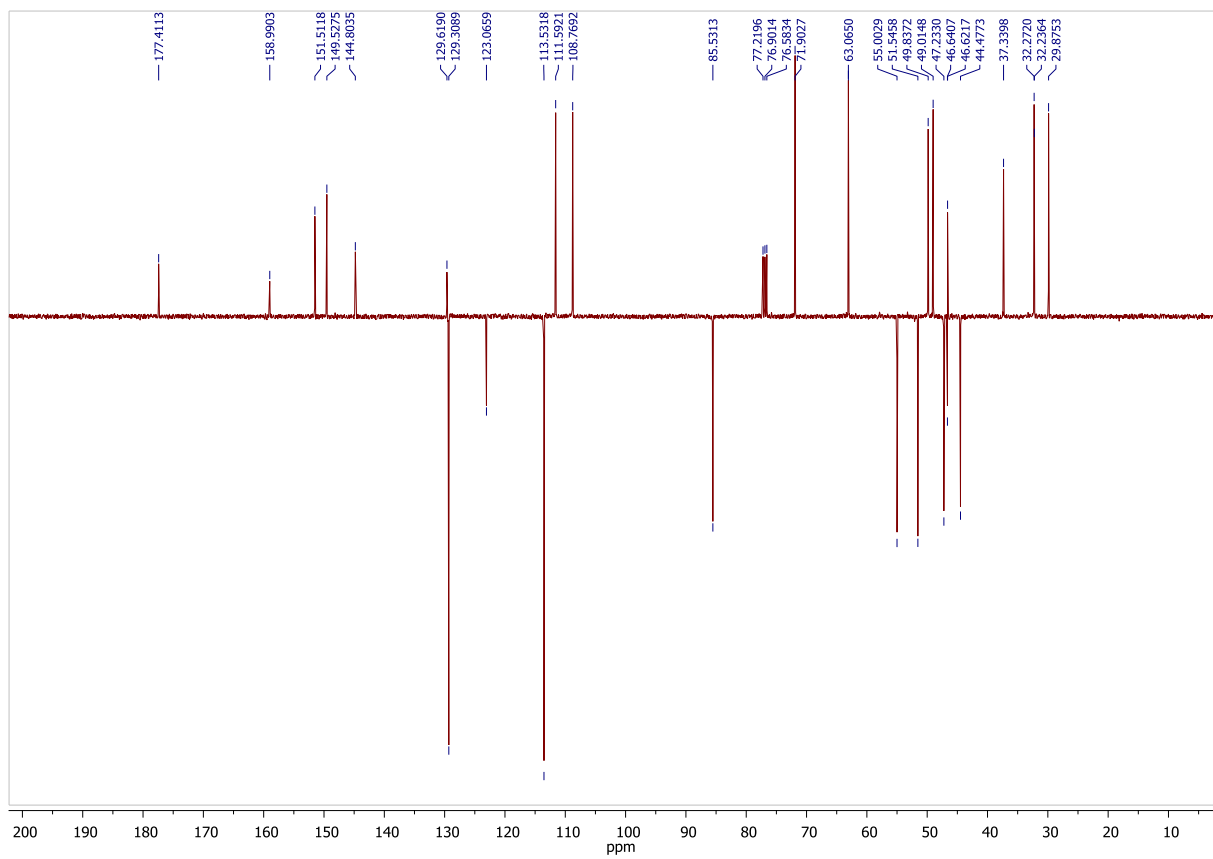

<sup>1</sup>H and <sup>13</sup>C NMR spectra of compound **6b** (CDCl<sub>3</sub>)

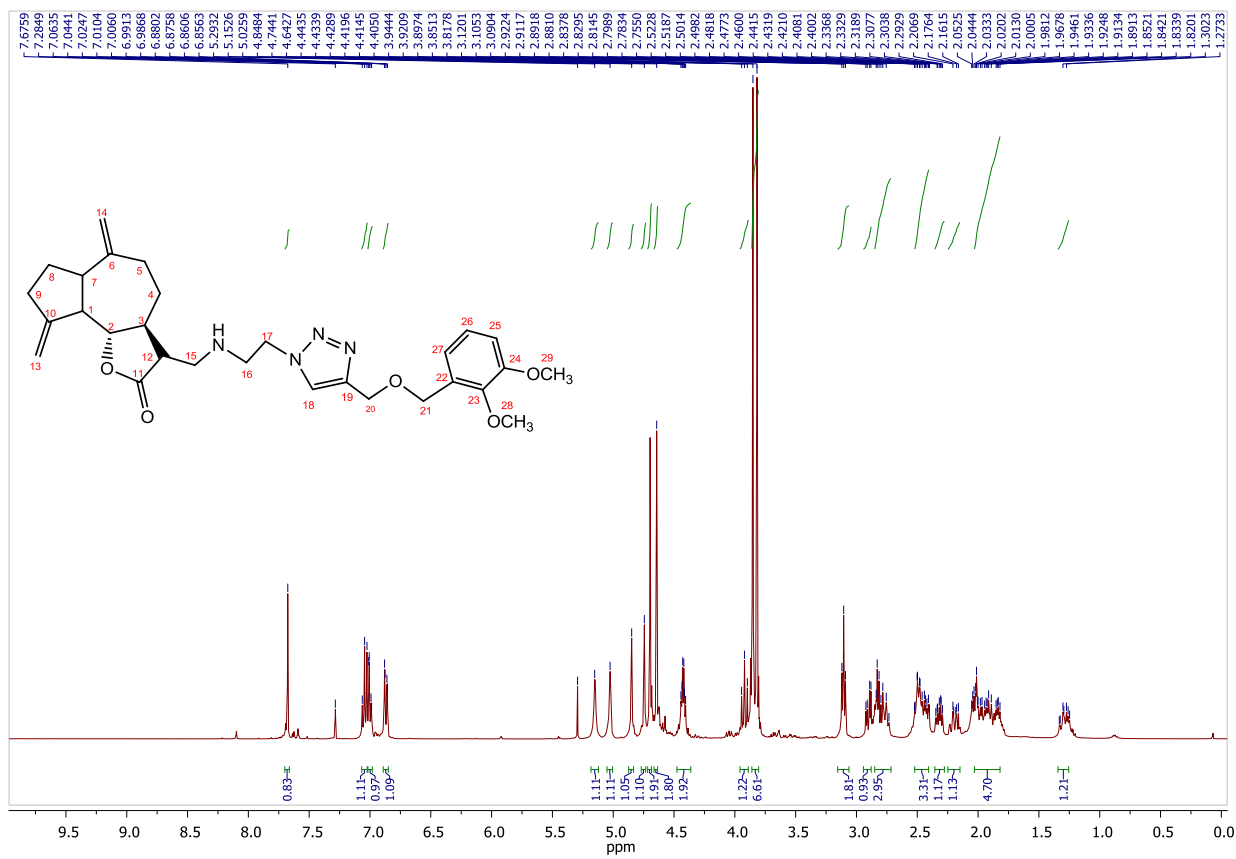

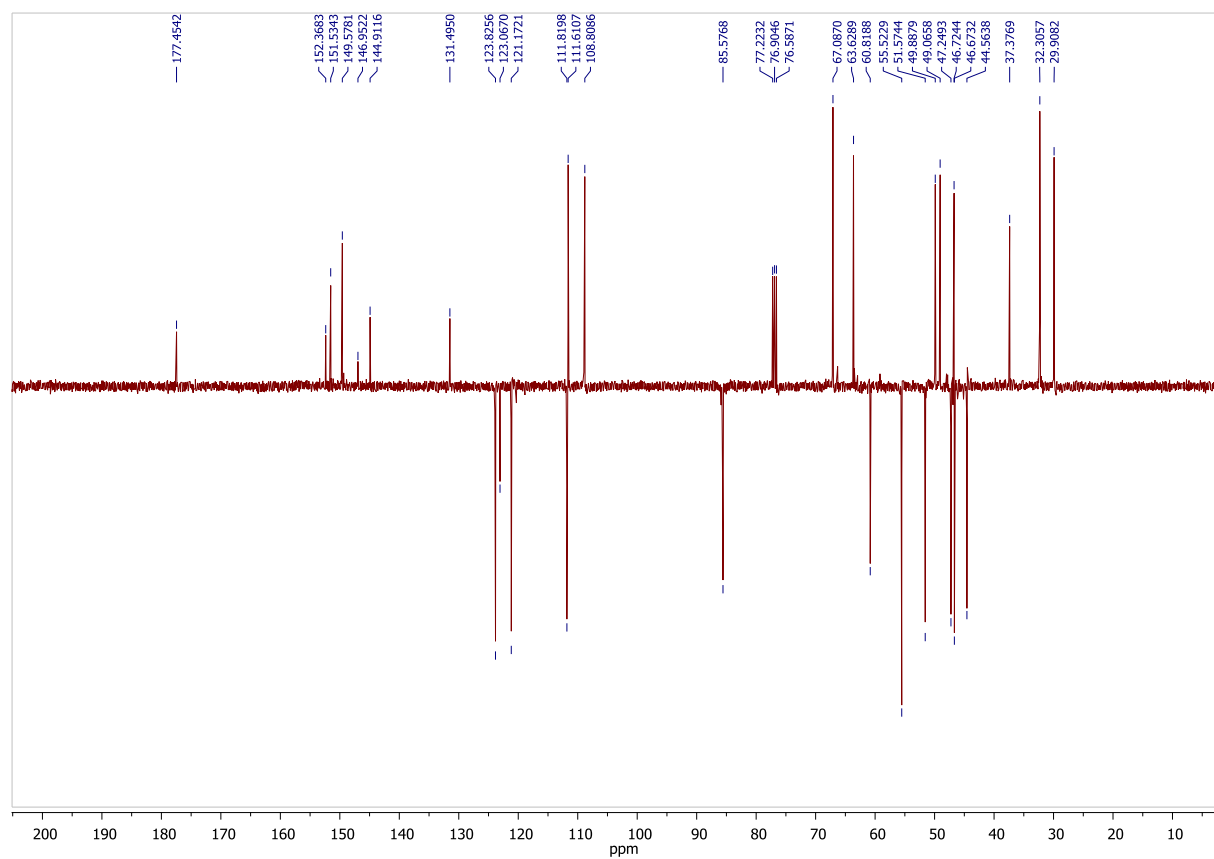

$^1\text{H}$  and  $^{13}\text{C}$  NMR spectra of compound **6c** ( $\text{CDCl}_3$ )

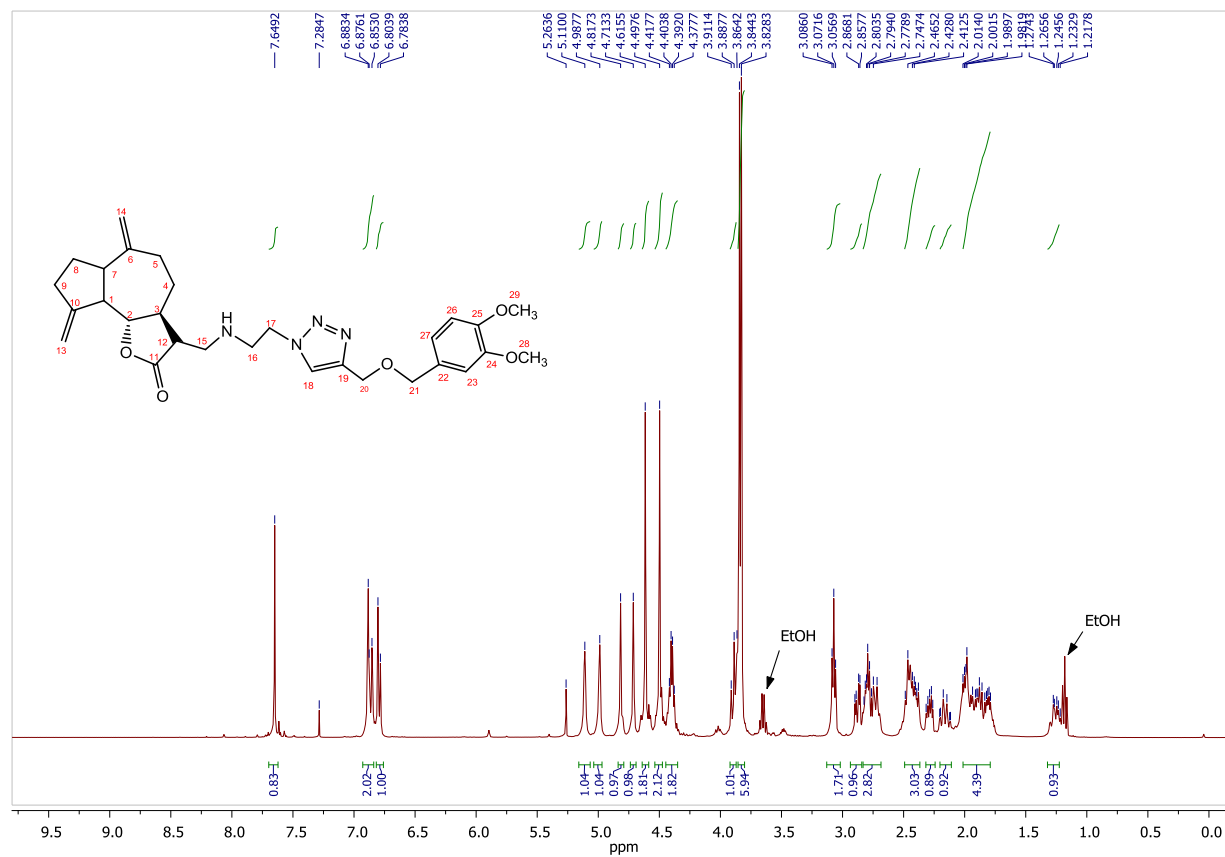

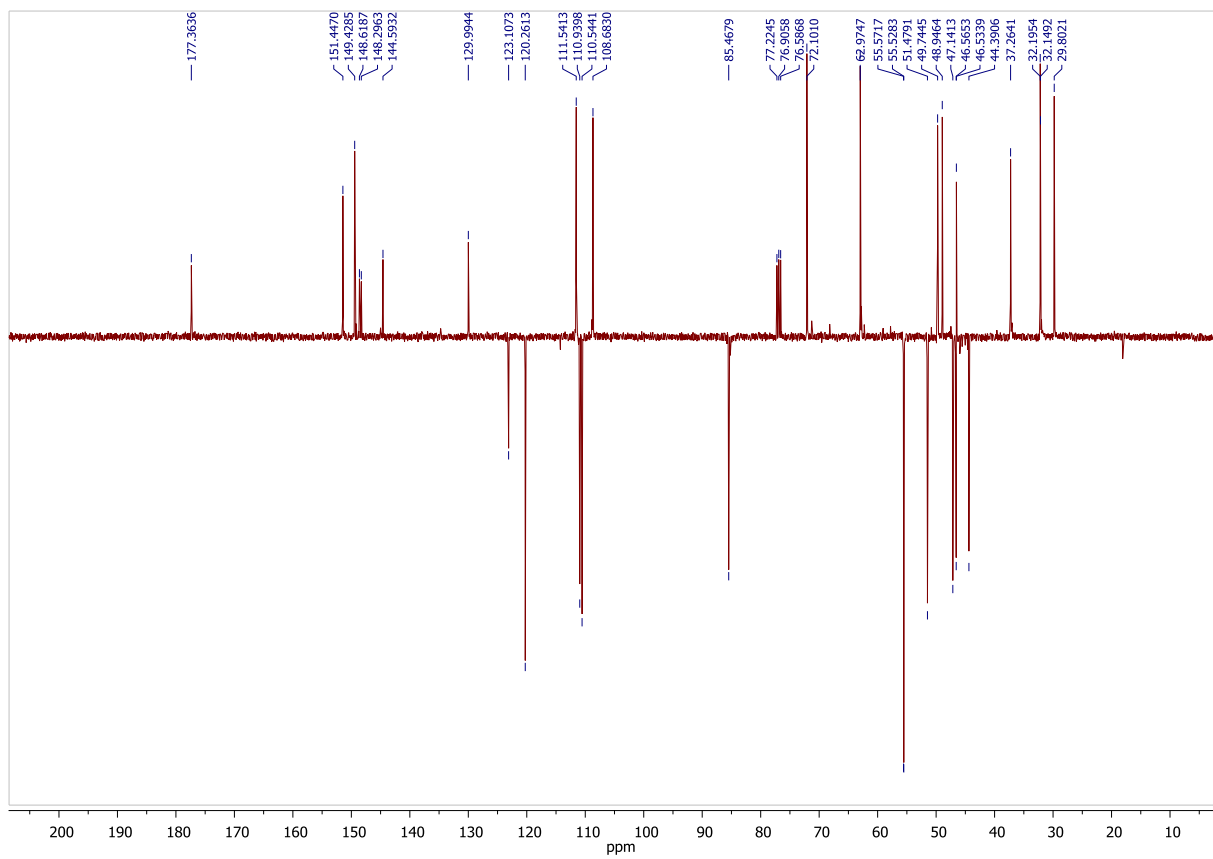

<sup>1</sup>H and <sup>13</sup>C NMR spectra of compound **6d** (CDCl<sub>3</sub>)

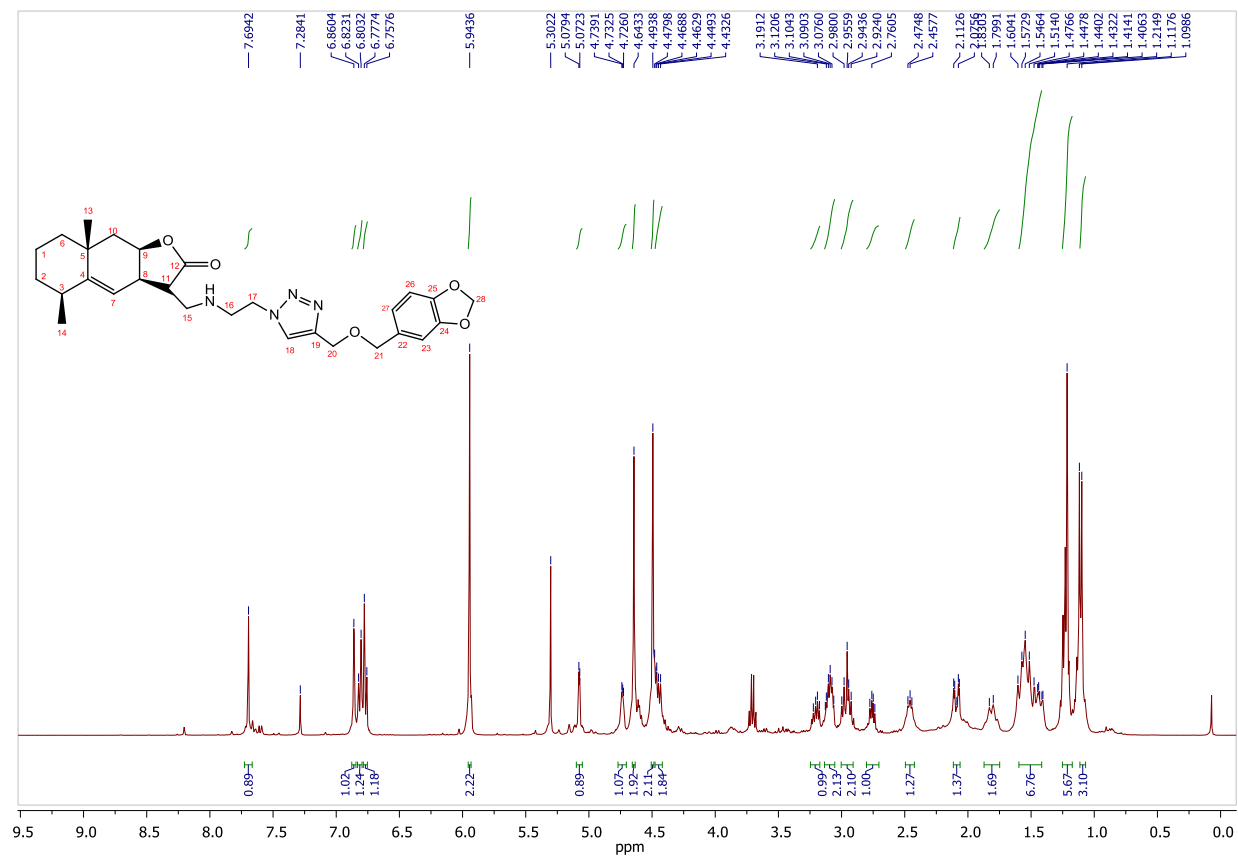



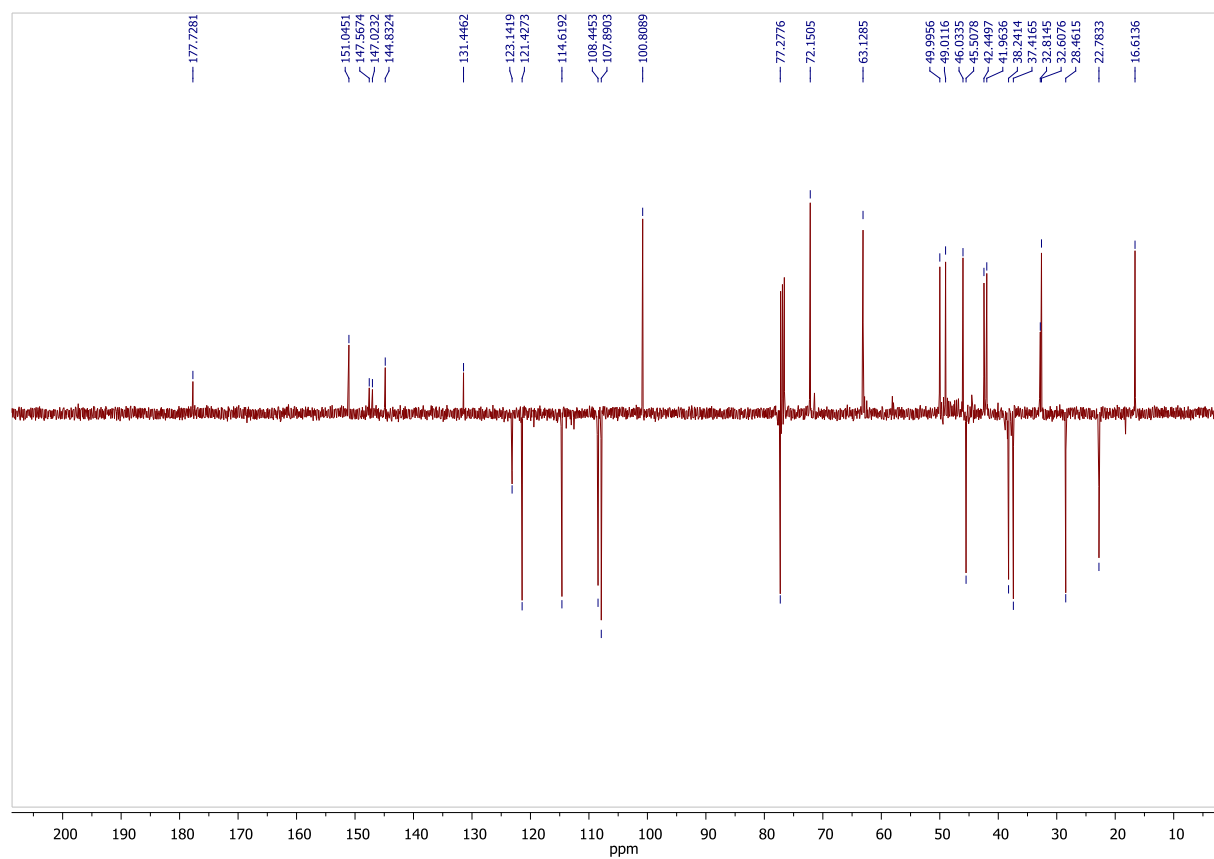

<sup>1</sup>H and <sup>13</sup>C NMR spectra of compound **7a** (CDCl<sub>3</sub>)

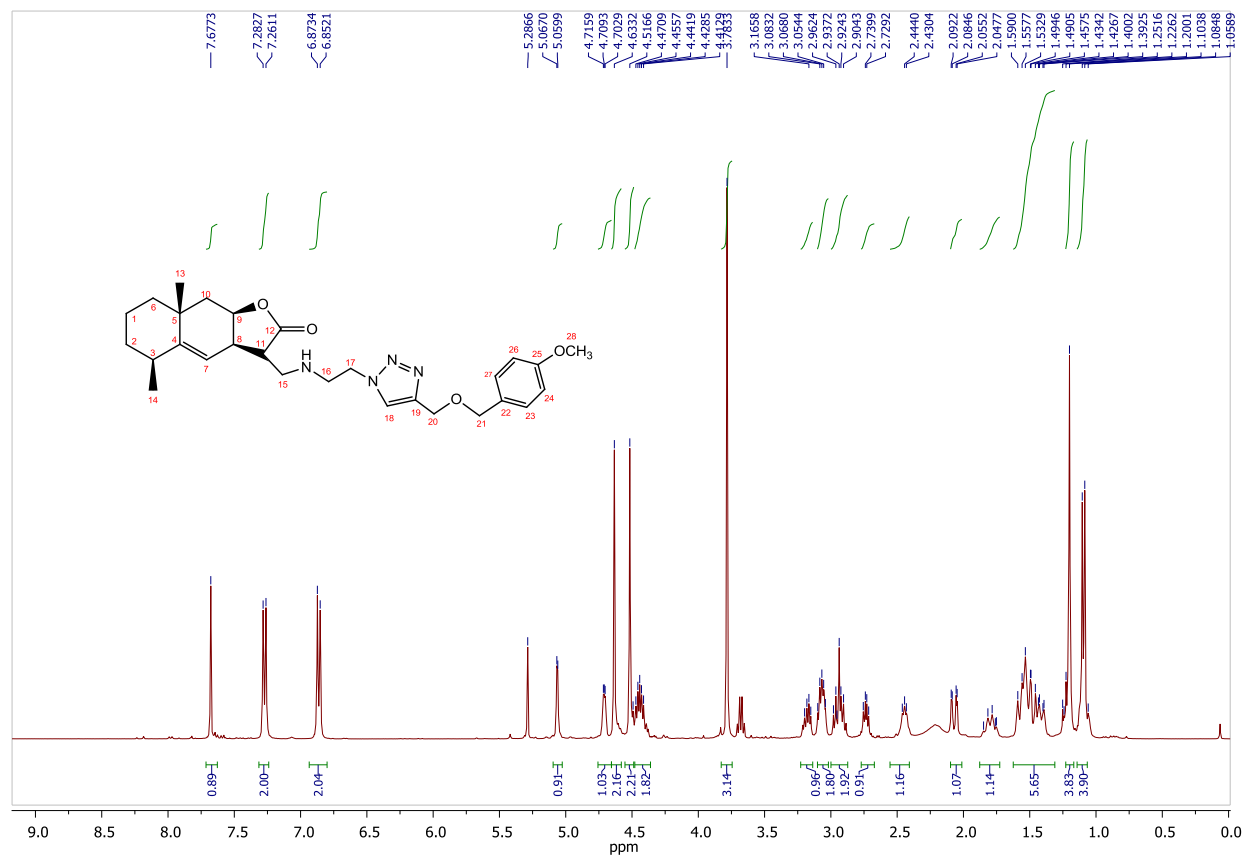

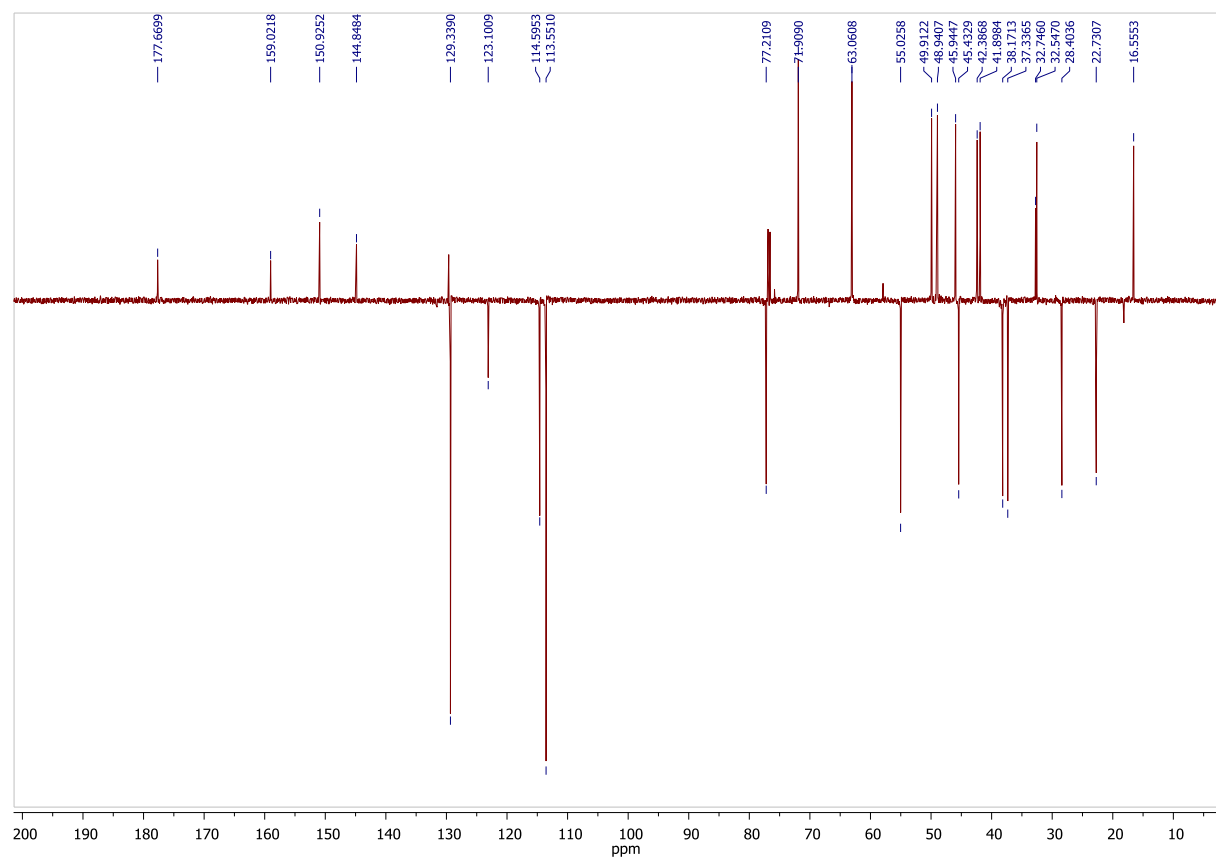

$^1\text{H}$  and  $^{13}\text{C}$  NMR spectra of compound **7b** ( $\text{CDCl}_3$ )

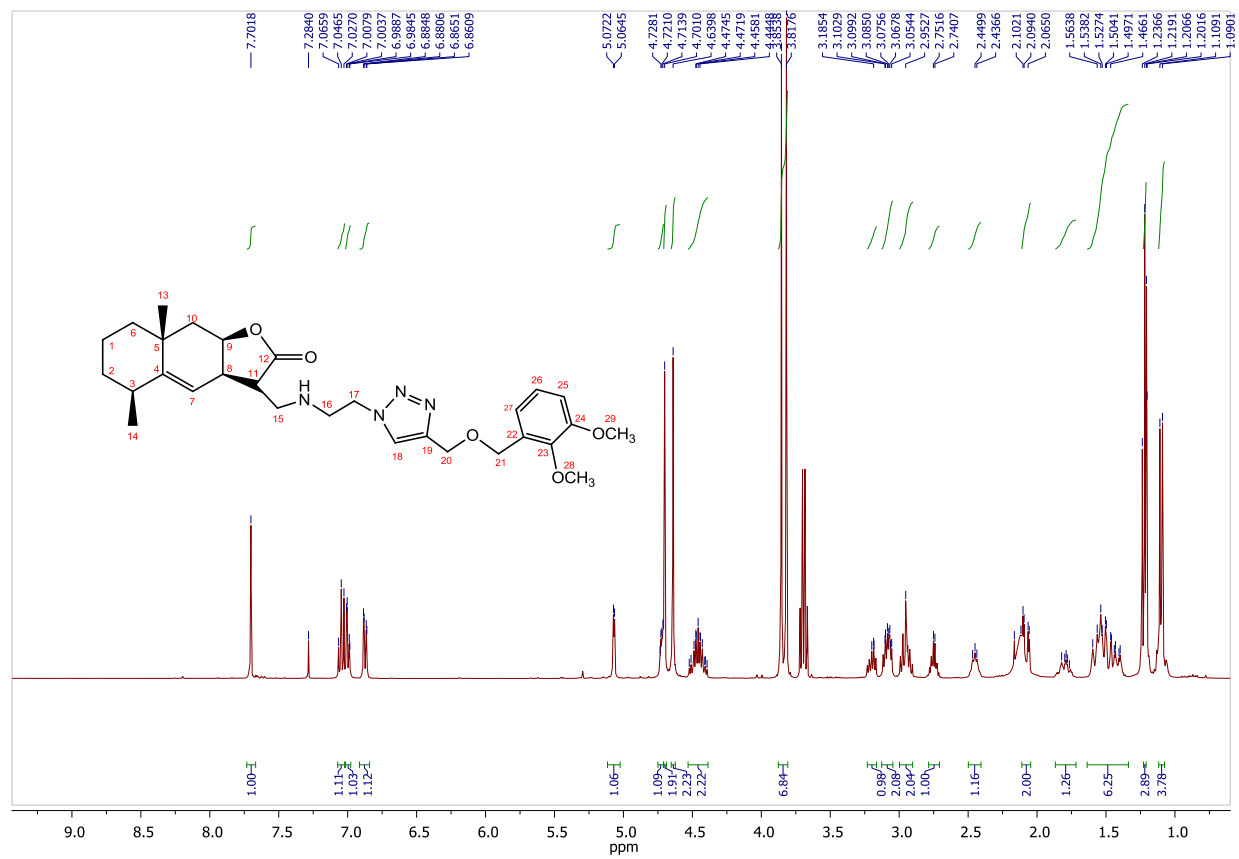

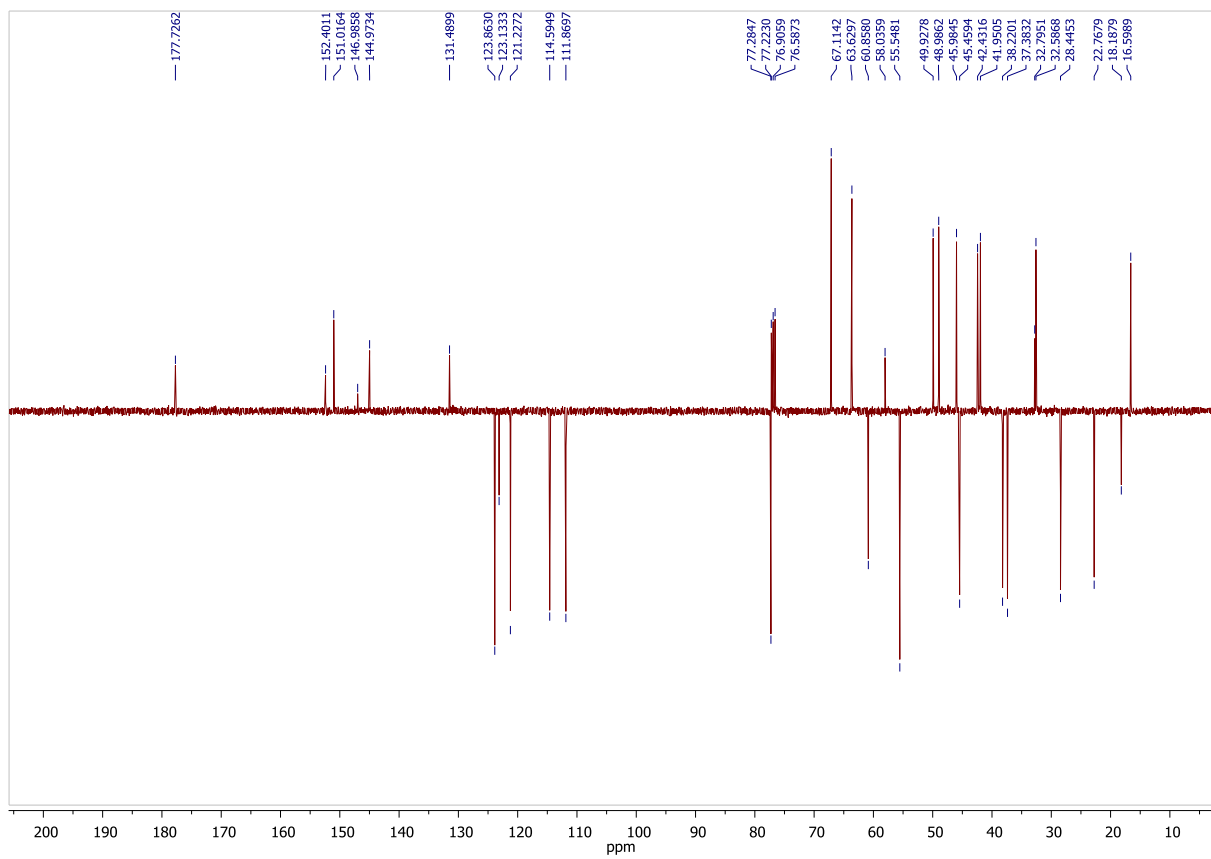

$^1\text{H}$  and  $^{13}\text{C}$  NMR spectra of compound **7c** ( $\text{CDCl}_3$ )

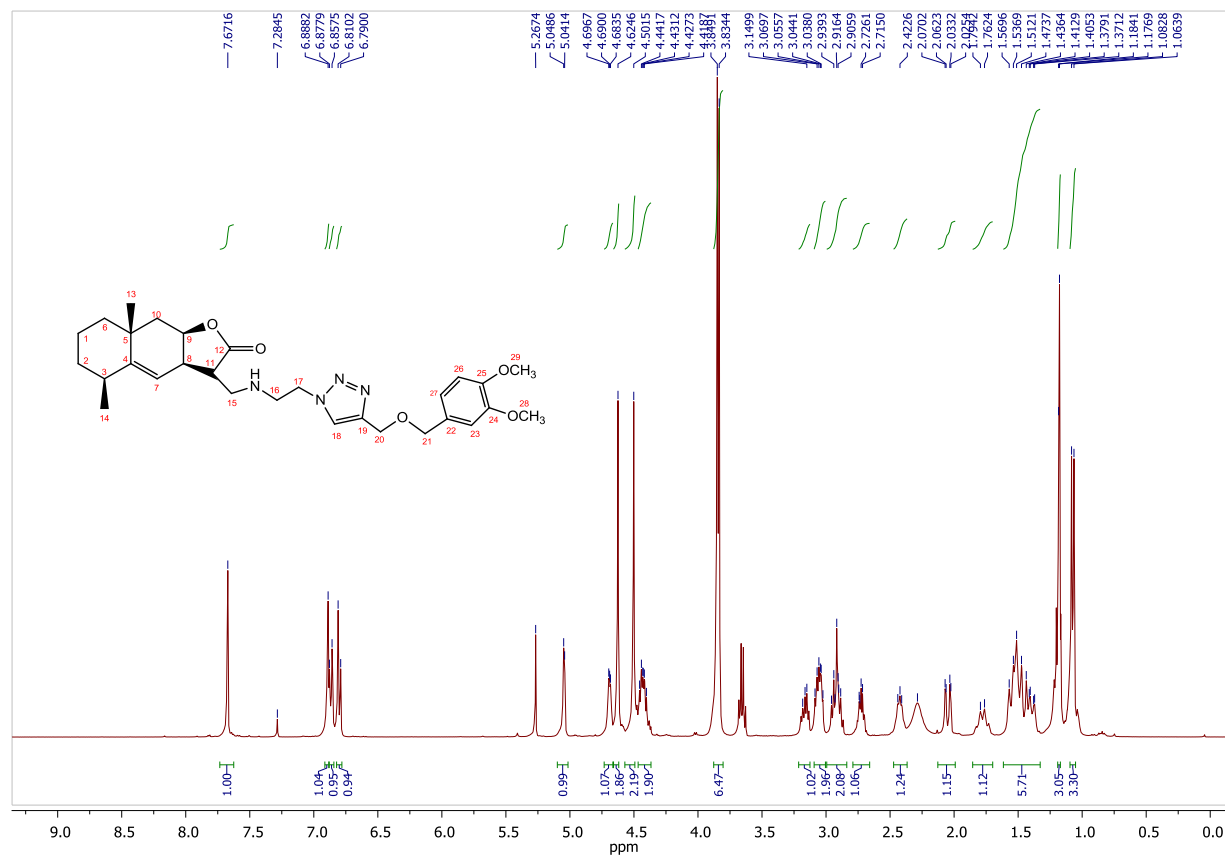

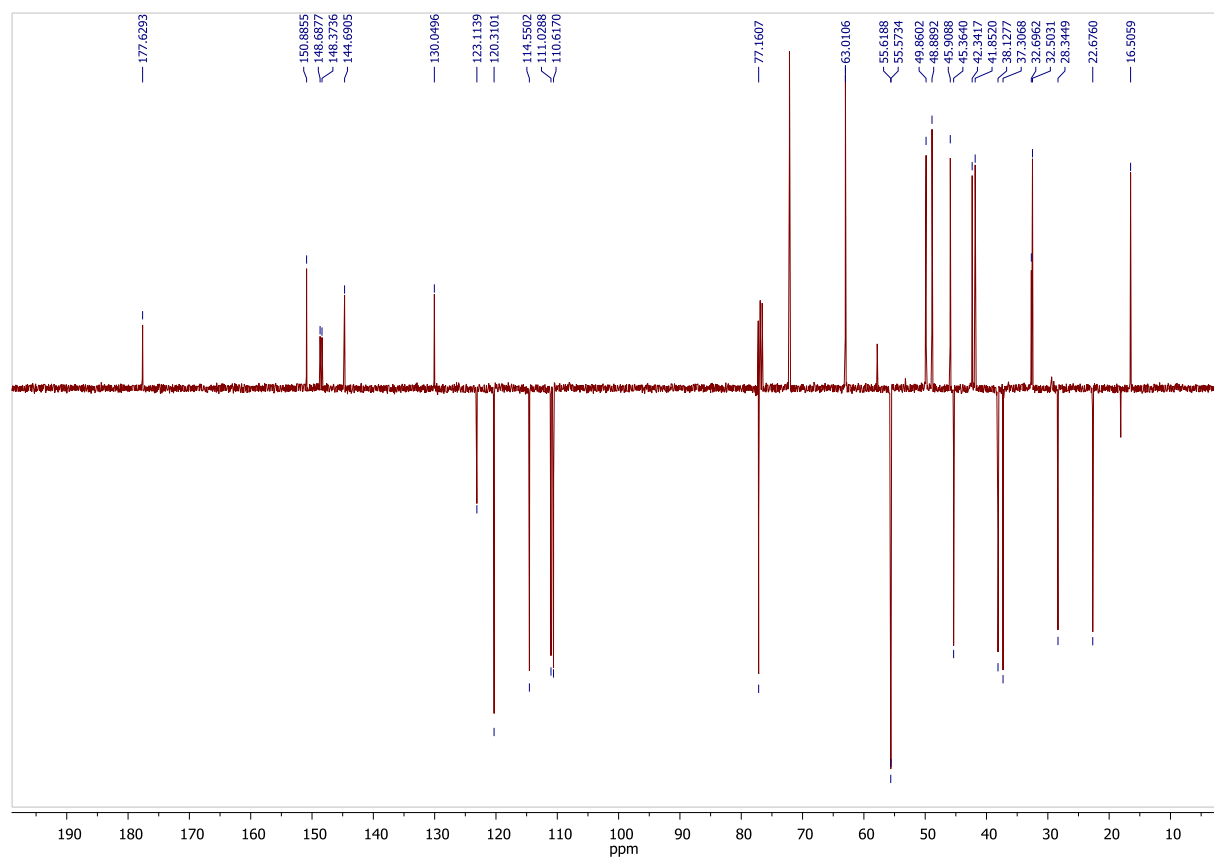

$^1\text{H}$  and  $^{13}\text{C}$  NMR spectra of compound **7d** ( $\text{CDCl}_3$ )
